# Supplementary material for: A Comparison of Watermelon Flesh Texture across Different Ploidy Levels Using Histology and Cell Wall Measurements
Source: MDPI journal article supplement (doi:10.3390/horticulturae10020112), 2024-01-24
Supplement: s1 [file s1]

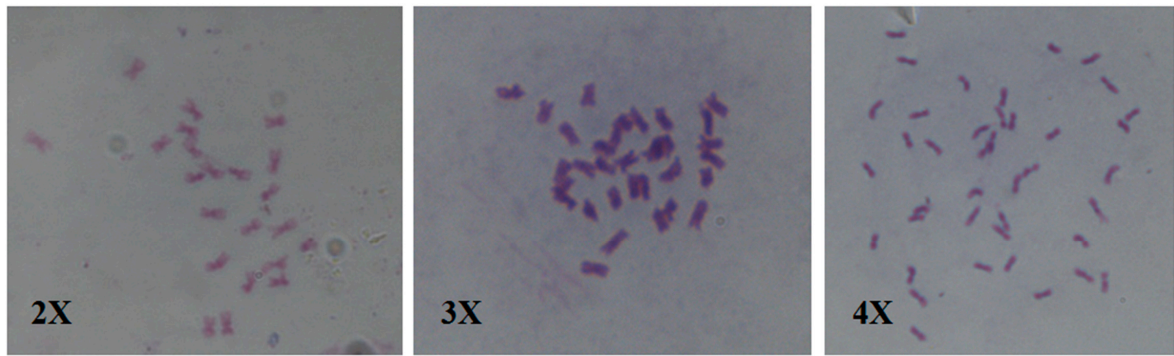

**Figure S1.** The ploidy level of the experimental materials was determined using the chromosome observation method.
